# Supplementary material
Source: publisher figshare collection journal article supplement (https://tandf.figshare.com/ndownloader/files/5202739)
Supplement: Supplementary file 1 [file 5202739]

**Supplementary information to:**

**Liquid phase membrane extraction of targeted pesticides from manufacturing wastewaters in a hollow fiber contactor with feed-stream recycles**

Author name:

Jelena Đorđević, Goran T. Vladisavljević, Tatjana Trtić-Petrović

Figure S1(a)





Figure S1(b)





Figure S1(c)





Figure S1(d)





Figure S1(e)





Figure S1. The plot for the determination of the overall mass transfer coefficient for (a) TEB, (b) LIN, (c) DIM, (d) ACE and (IMI). The acceptor phase was stagnant. Legend: feed flow rate (cm3 min-1): ◊ - 0.5, ∇ - 0.8, ∆ - 1.1, ○ – 1.5, and □ – 1.8.

Table S1. Slope of the Line in Figure S1 ( ) and the Overall Mass-Transfer Coefficient (KF), as a function of the Feed-Phase Flow Rate for the Extraction of the selected pesticides in Recirculating LPME-HF.

| QF  cm3min-1 | TEB | | LIN | | DIM | | ACE | | IMI | |
| --- | --- | --- | --- | --- | --- | --- | --- | --- | --- | --- |
| Slope* | KF | Slope | KF | Slope | KF | Slope* | KF | Slope | KF |
| 0.5 | 0.0190 | 0.0607 | 0.0155 | 0.0289 | 0.0181 | 0.0395 | 0.0167 | 0.0312 | 0.0167 | 0.0298 |
| 0.8 | 0.0405 | 0.1173 | 0.0289 | 0.0602 | - | - | - | - | - | - |
| 1.1 | - | - | - | - | 0.0271 | 0.0435 | 0.0215 | 0.0331 | 0.0203 | 0.0308 |
| 1.5 | 0.0702 | 0.2143 | 0.0429 | 0.0824 | - | - | - | - | - | - |
| 1.8 | 0.0814 | 0.2291 | 0.0681 | 0.1487 | 0.0338 | 0.0515 | 0.0255 | 0.0355 | 0.0255 | 0.0355 |

*min-1
